# Supplementary material
Source: publisher figshare collection journal article supplement (https://tandf.figshare.com/articles/dataset/_/7872017)

Figure S1

A

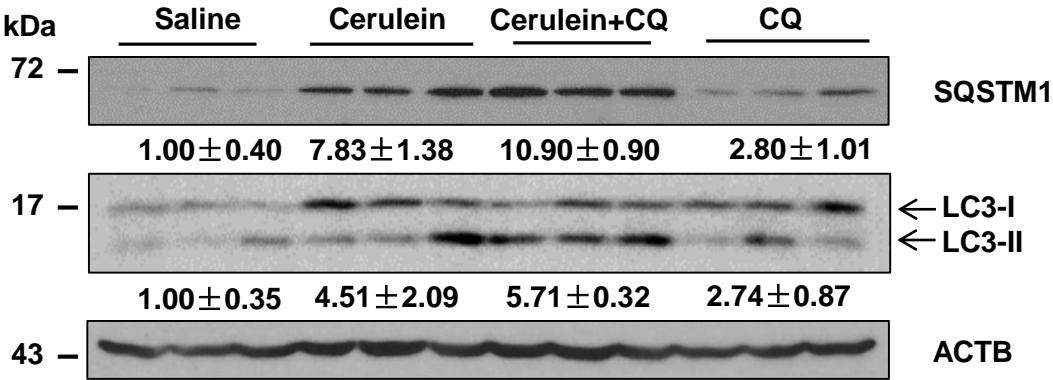

B

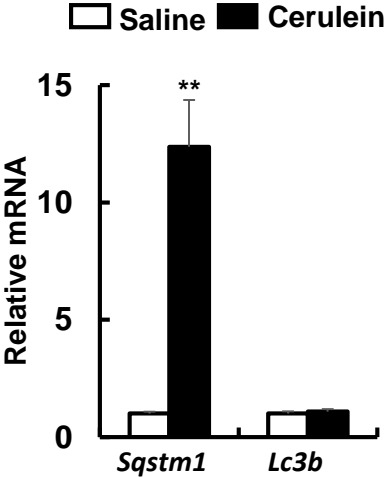

**Figure S2**

**A**

**Starvation**

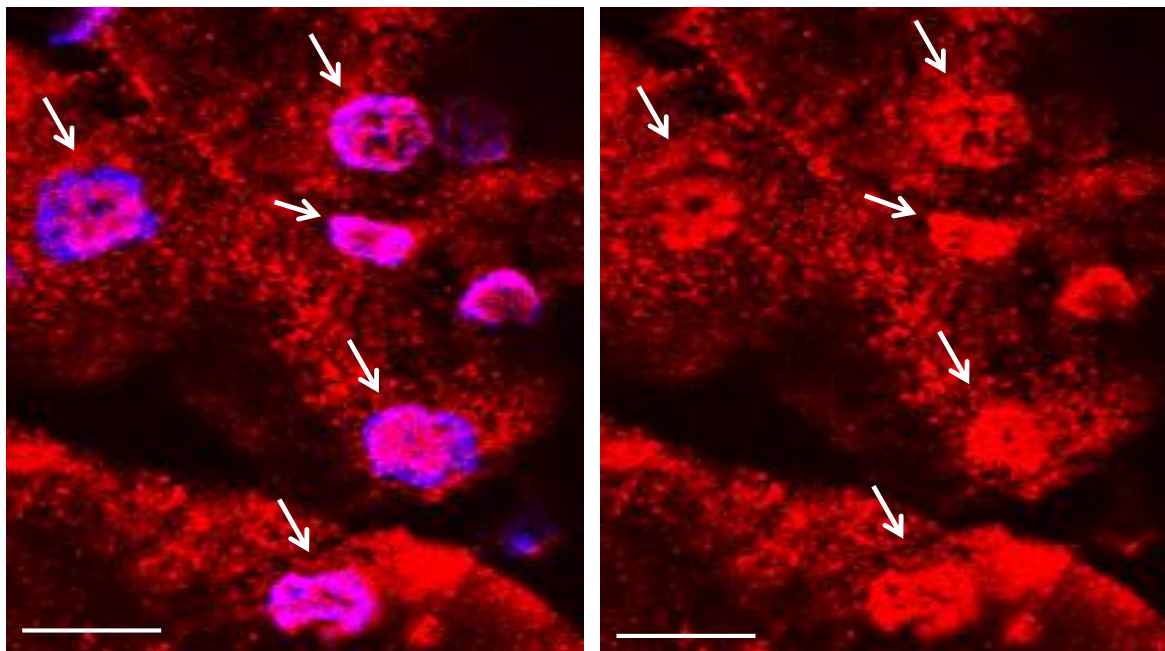

**B**

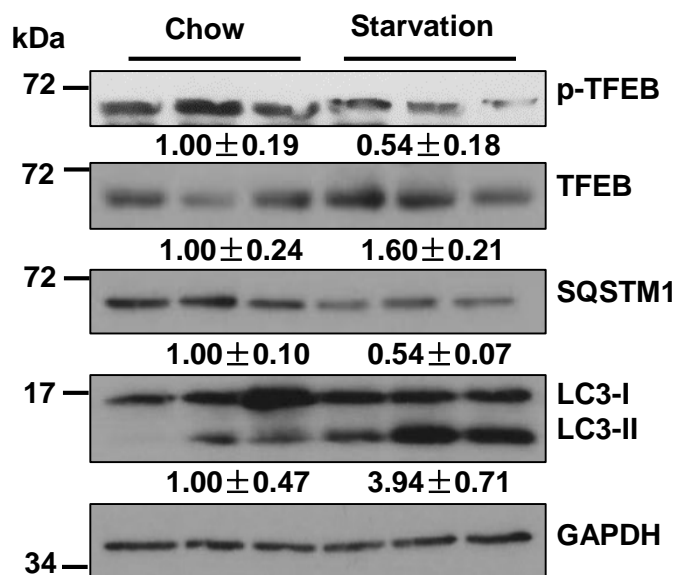

**Figure S3**

**A**

**Mouse**

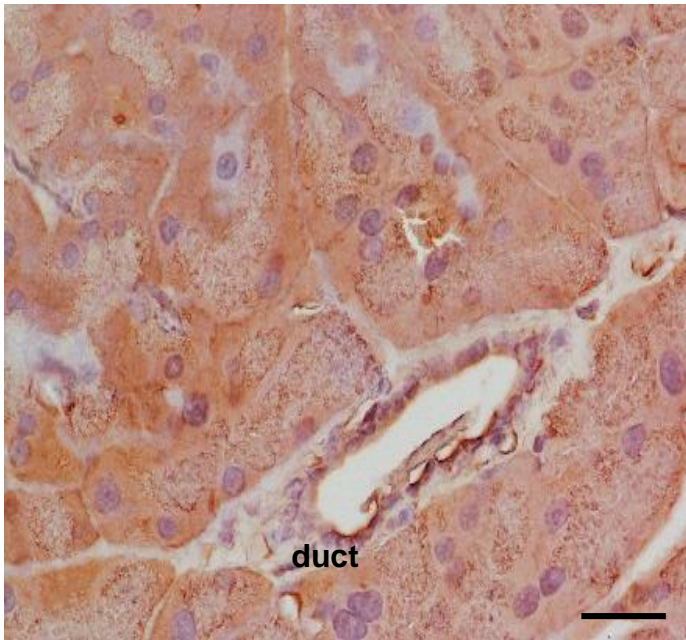

**B**

**Human**

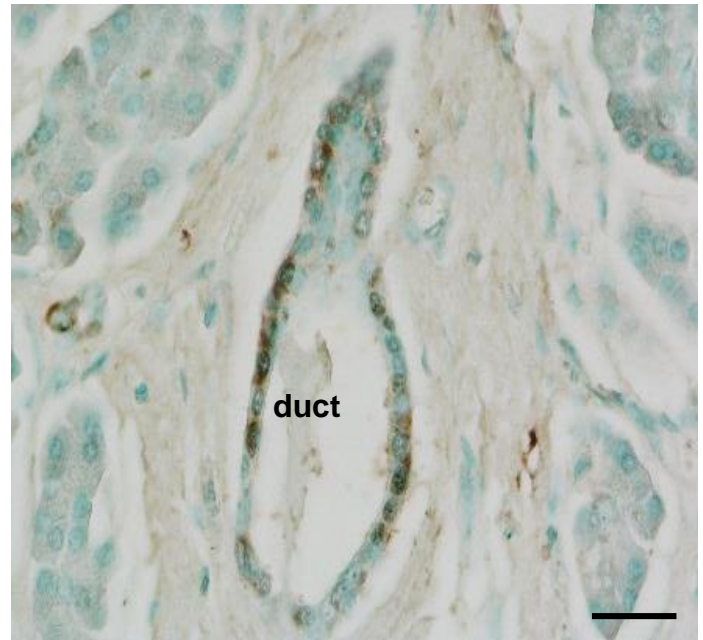

**Figure S4**

**A**

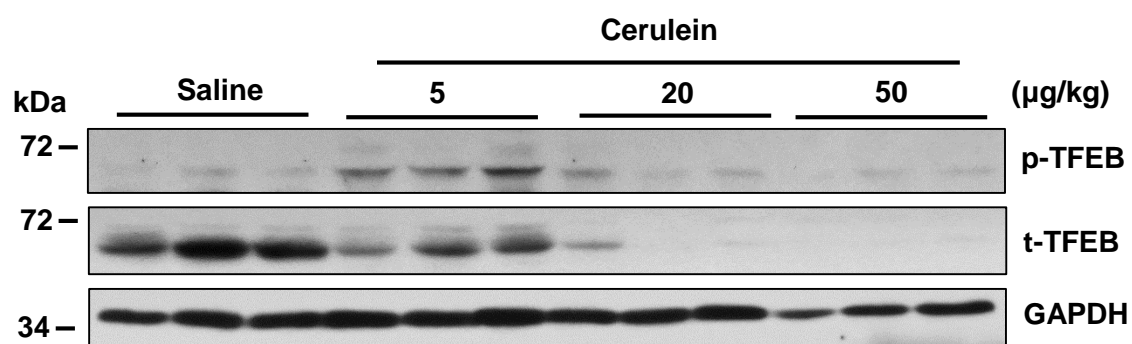

**B**

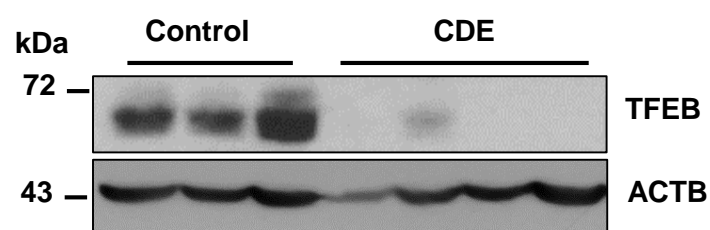

**Figure S5**

**A**

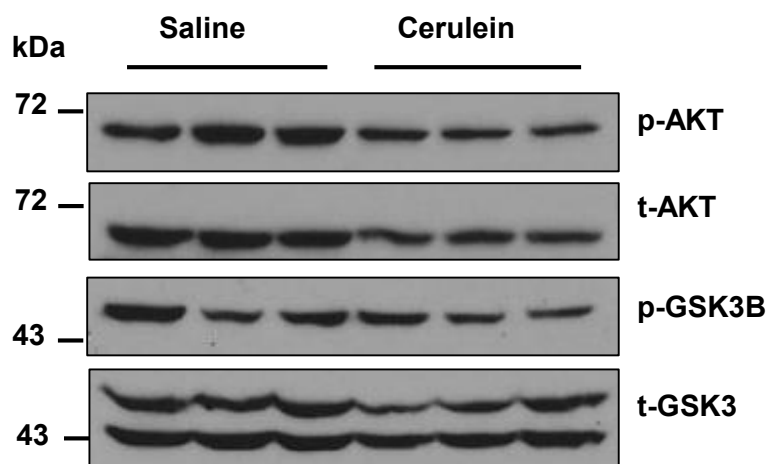

**B**

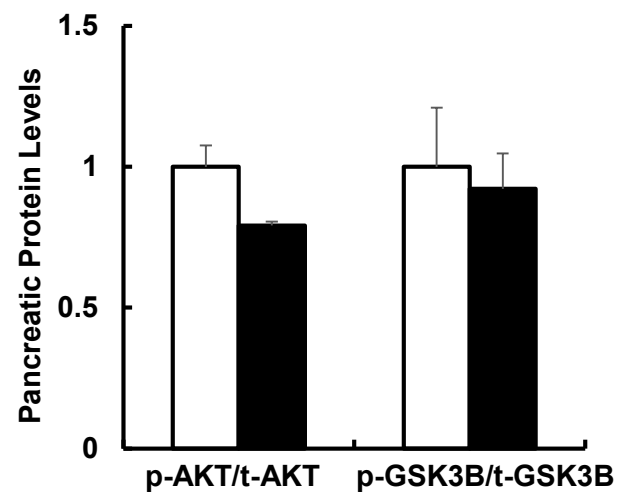

# Figure S6

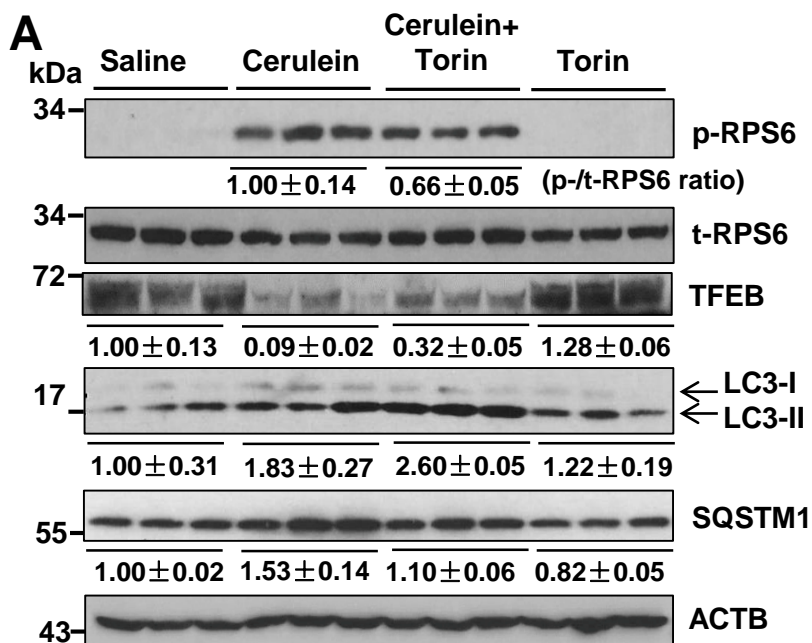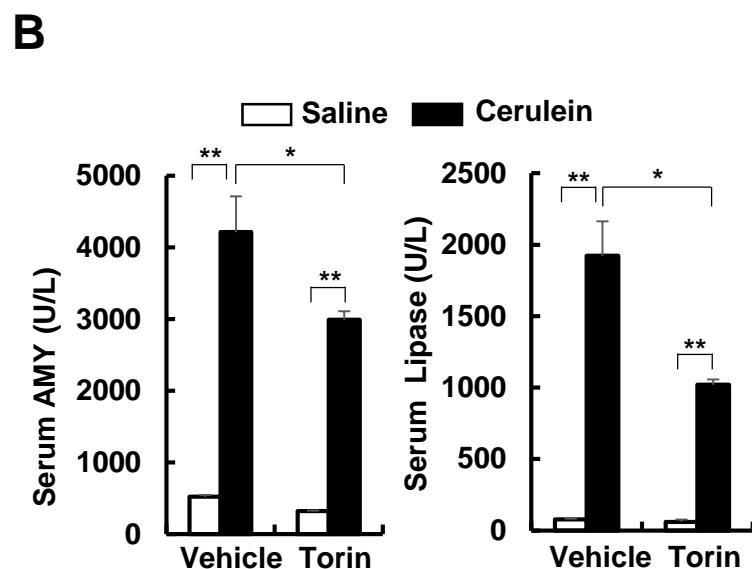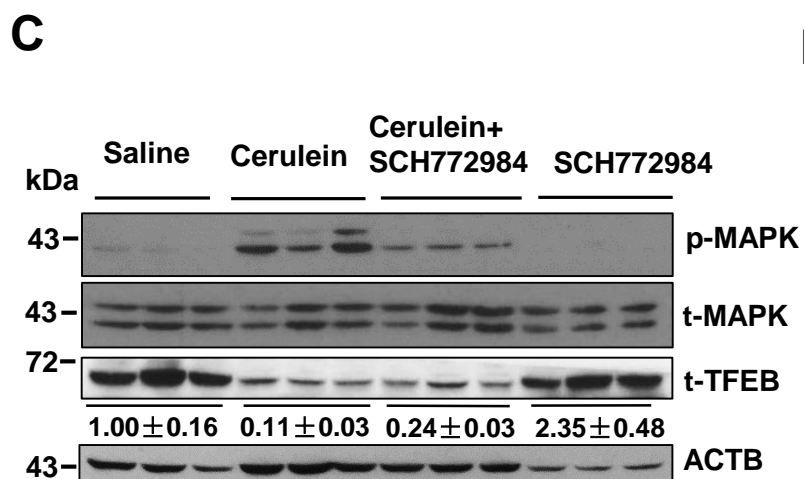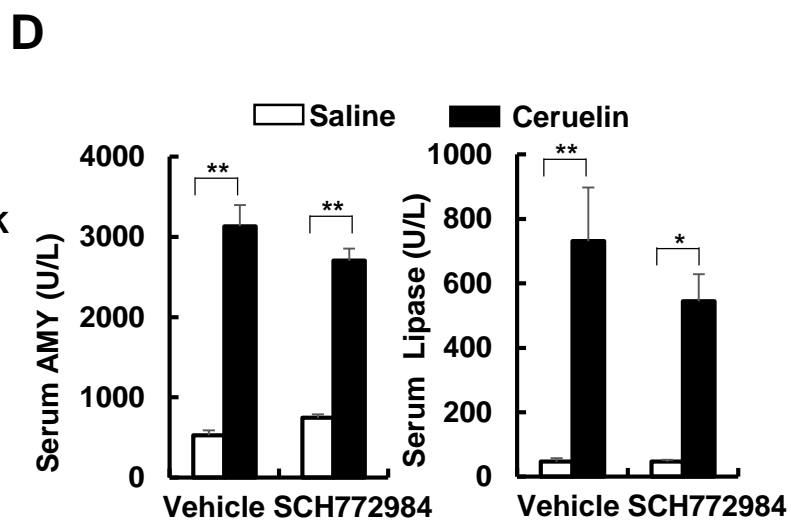

Figure S7

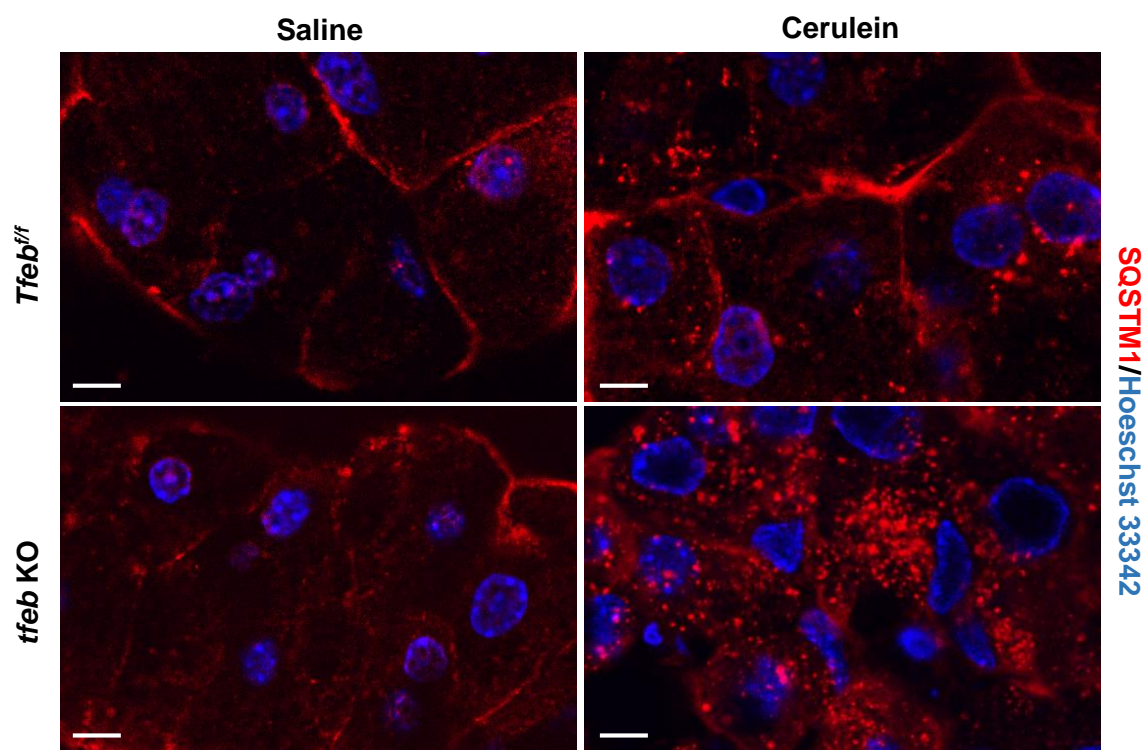



**Figure S8**

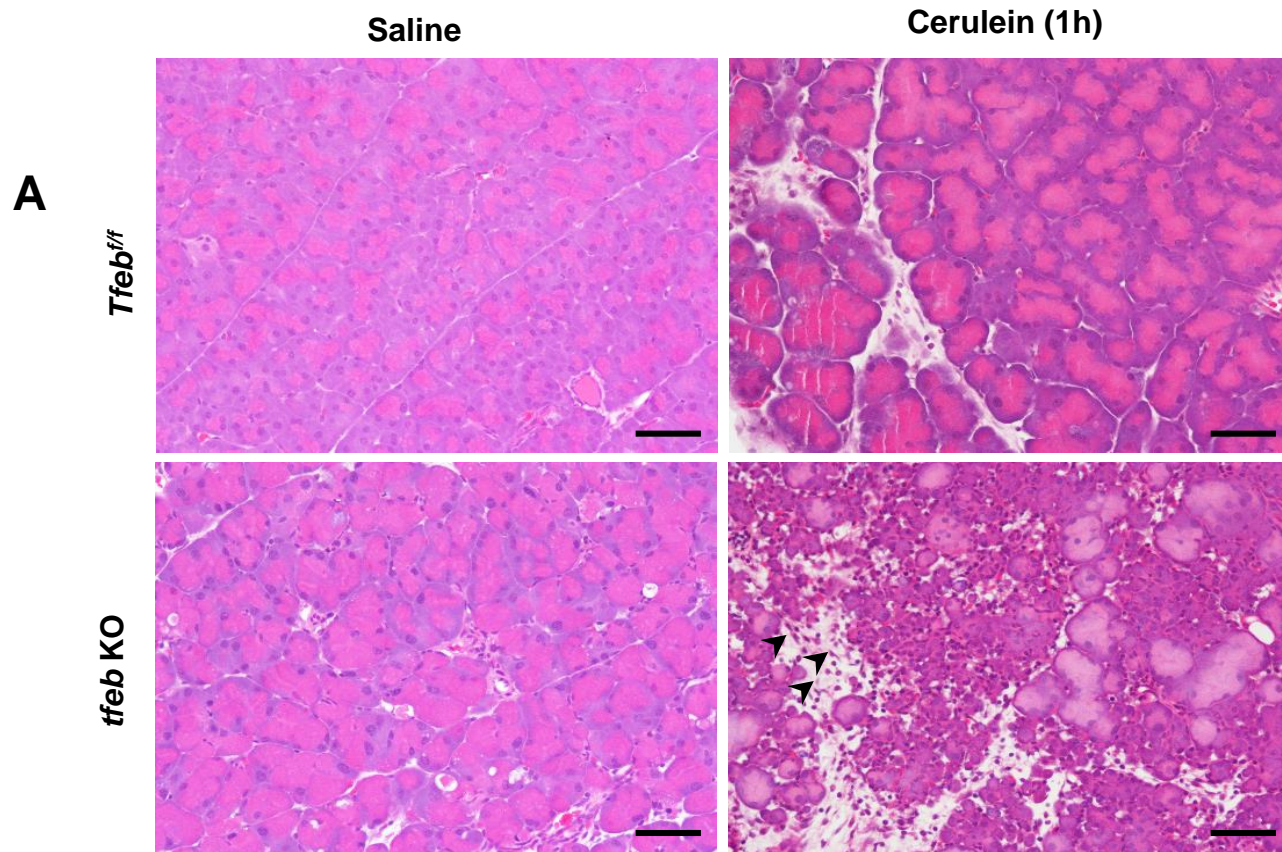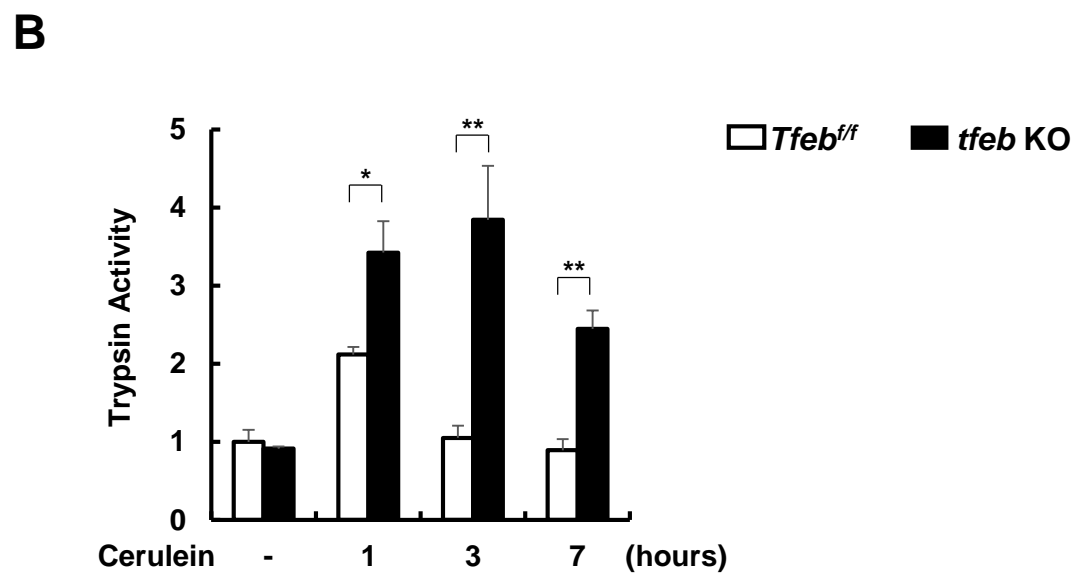



Figure S9

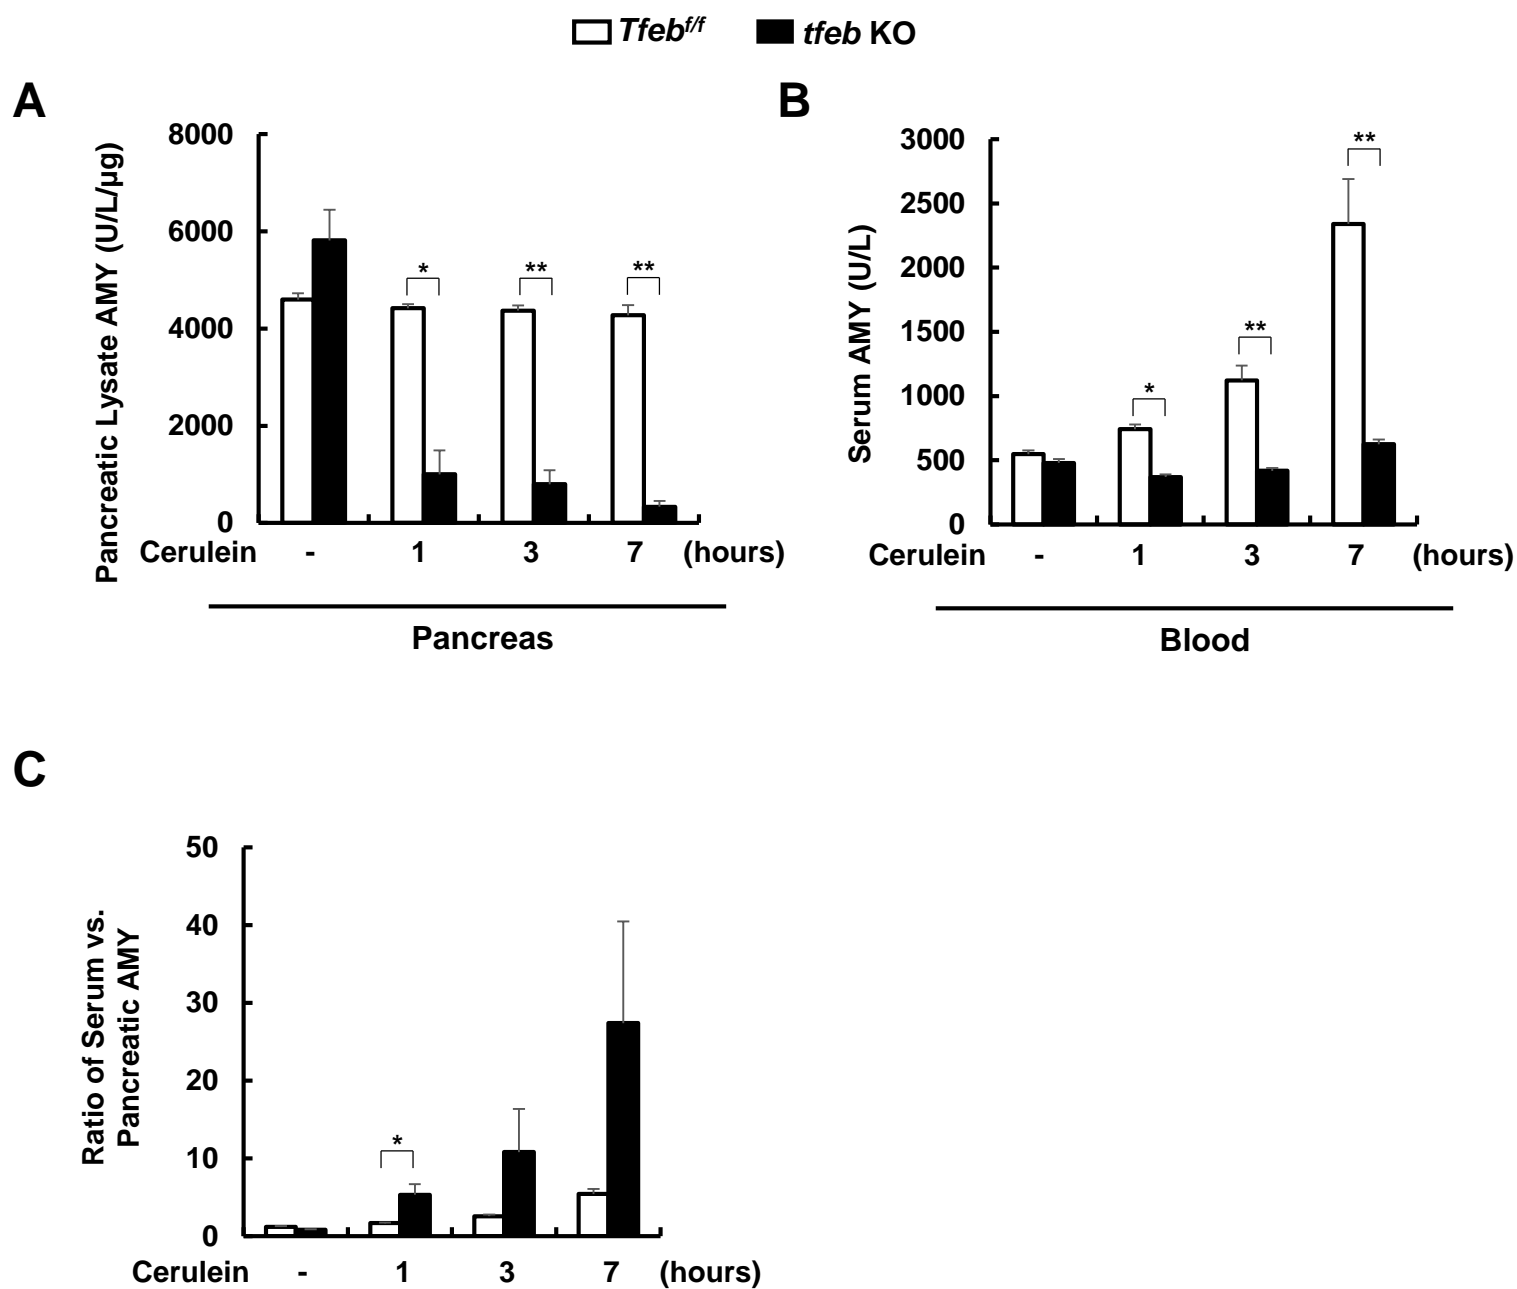

Figure S10

| SQSTM1       | light brown | brown       | dark brown |
|--------------|-------------|-------------|------------|
| Donor        | 6/8 (75%)   | 2/8 (25%)   | 0 (0%)     |
| Pancreatitis | 14/45 (31%) | 28/45 (62%) | 3/45 (7%)  |

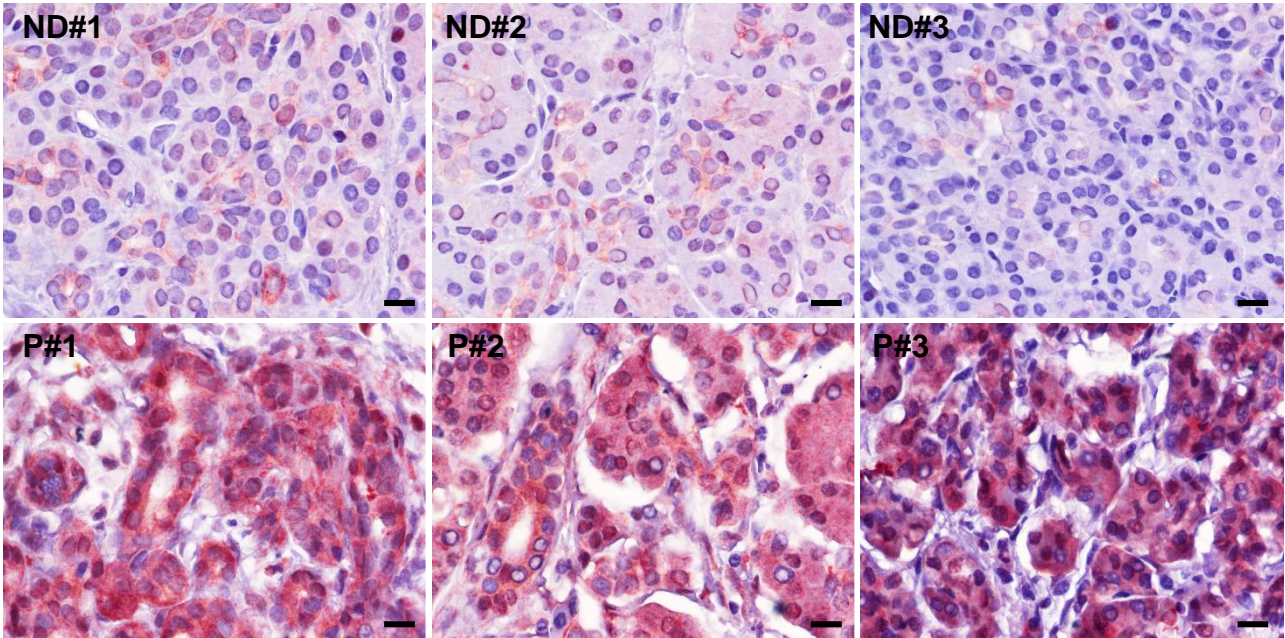

Supplement: Supplementary file 1 [file 3]
